# Supplementary material
Source: Springer Nature journal article supplement (https://www.springermedizin.de/resource/supplementary/12885_2011_3118_MOESM1_ESM.pdf/9462650)

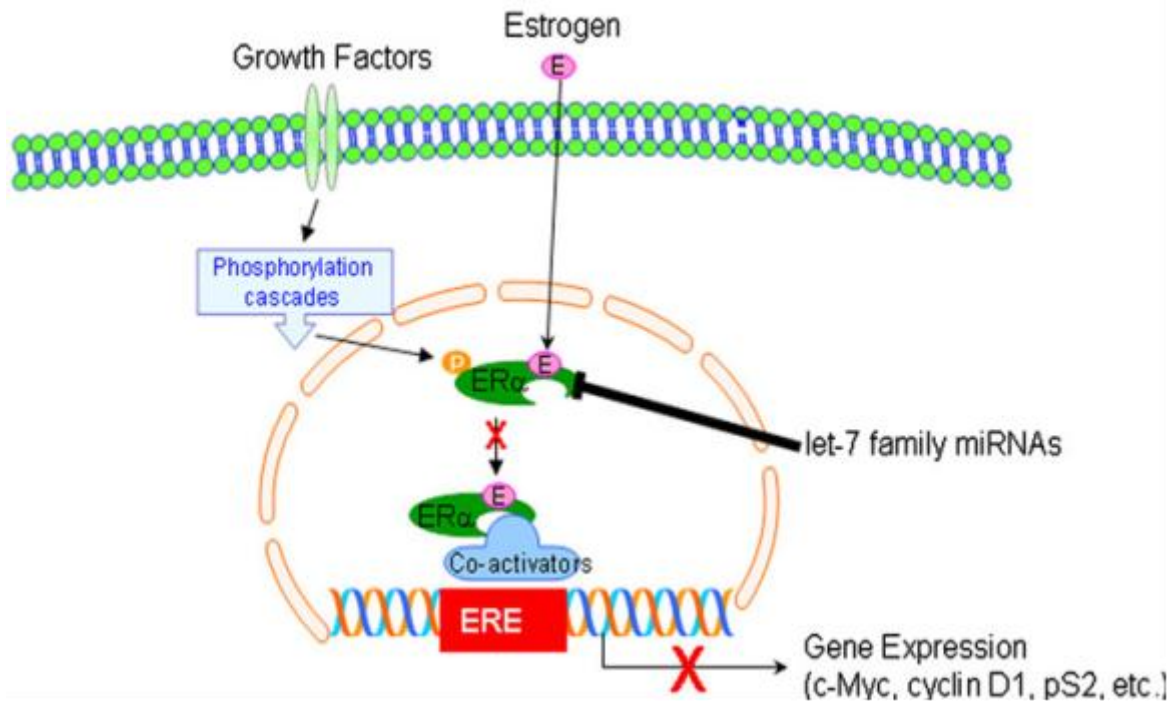

Supplement: MOESM1 [file 9462650]
